# Supplementary material
Source: Springer Nature journal article supplement (http://www.springermedizin.de/resource/supplementary/12958_2009_603_MOESM3_ESM.pdf/9568076)

**A**

Wild-type

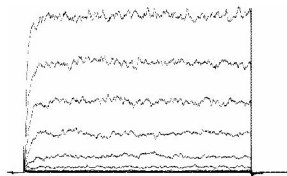

2000 pA 10 ms

**B**

F1012A

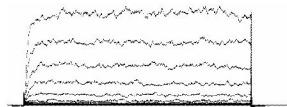**C**

Y1007A,F1012A

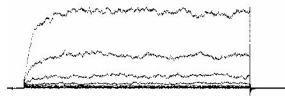**D**Y1007A,F1012A,  
Y1015A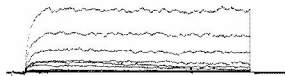**E**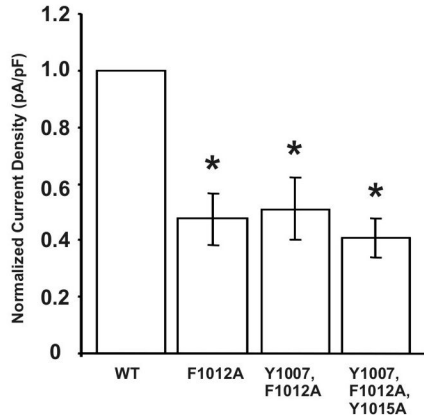

Supplement: MOESM3 [file 9568076]
